# Supplementary material for: Hierarchical porous carbon foam embedded with readily accessible atomic iron sites for efficient electrochemical nitrite sensing
Source: Royal Society of Chemistry journal article supplement (doi:10.1039/d3nj01826a), 2023-01-01
Supplement: d3nj01826a1.pdf [file d3nj01826a1.pdf]

## Supporting Information

### **Hierarchical porous carbon foam embedded with readily accessible atomic iron sites for efficient electrochemical nitrite sensing**

Runyang Miao, Hongyin Hu, Bingyan Zhang, Han Zhu, Mingliang Du, Shuanglong

Lu \*

Key Laboratory of Synthetic and Biological Colloids, Ministry of Education, School of Chemical and Material Engineering, Jiangnan University, Wuxi, 214122, P.R. China.

Corresponding Author: lushuanglong@jiangnan.edu.cn (Shuanglong Lu)

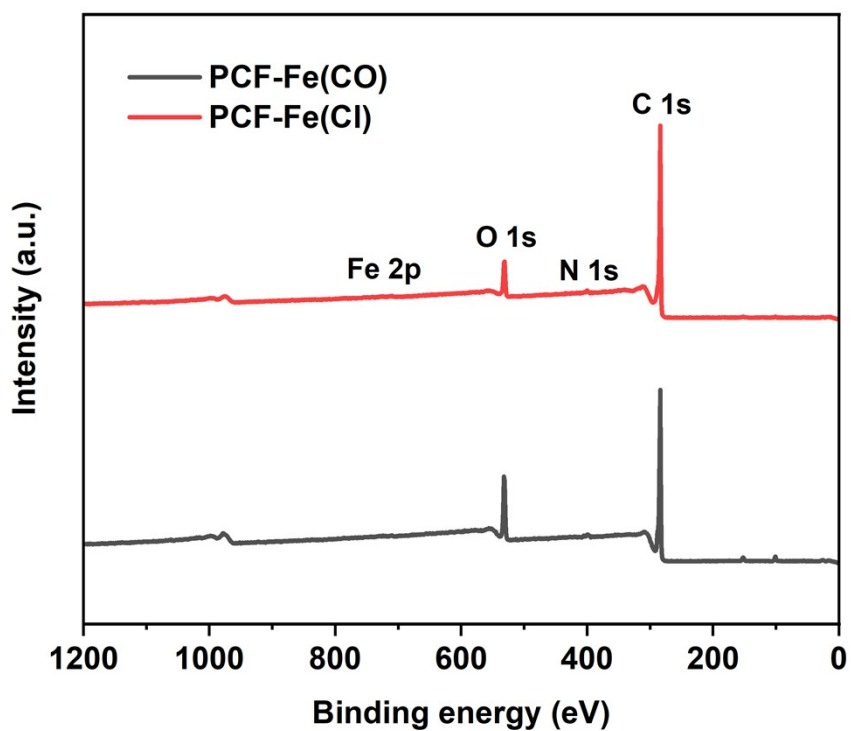

**Figure S1.** XPS spectra of PCF-Fe(Cl) and PCF-Fe(CO).

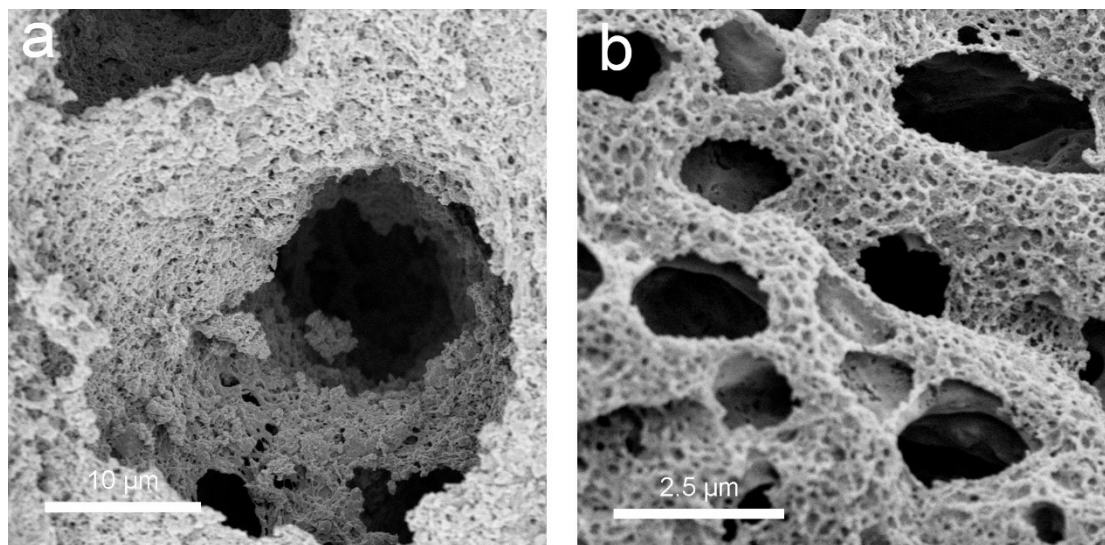

**Figure S2.** (a, b) SEM image of PCF-Fe(CO).

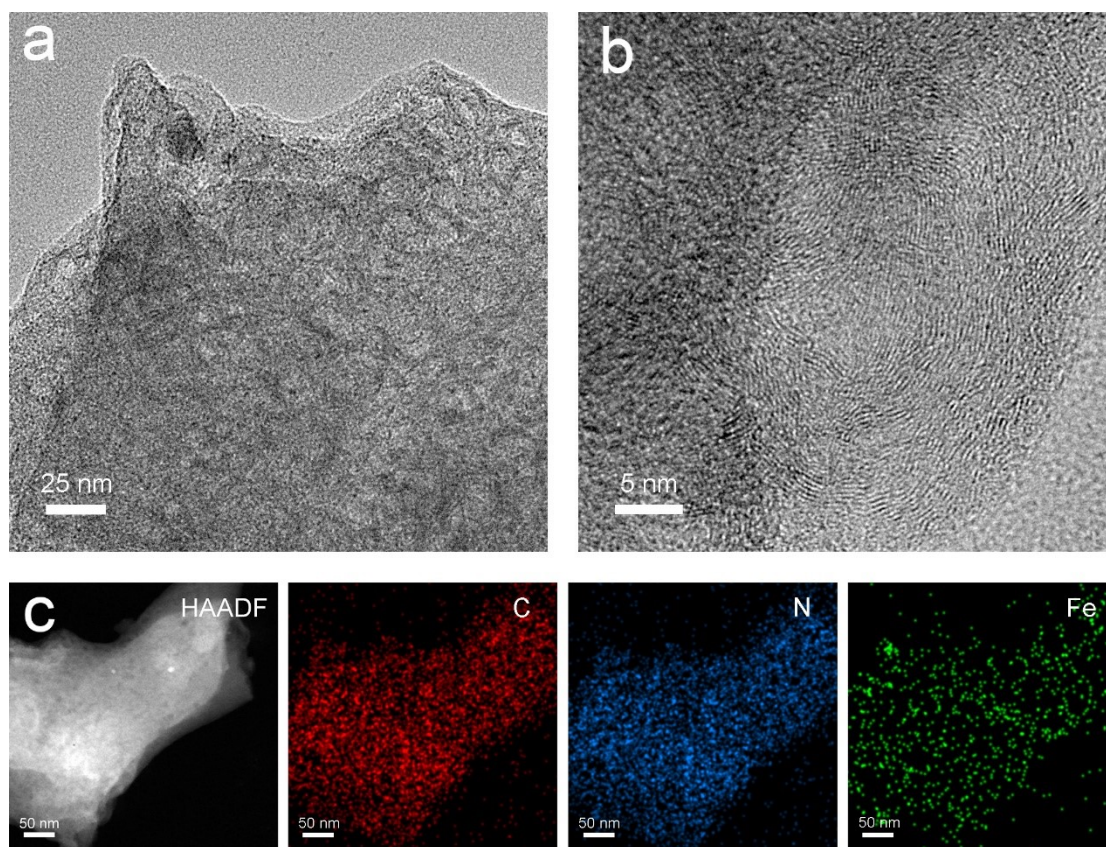

**Figure S3.** (a, b) TEM images of PCF-Fe(CO), (c) HAADF-STEM image and EDX mapping of PCF-Fe(CO).

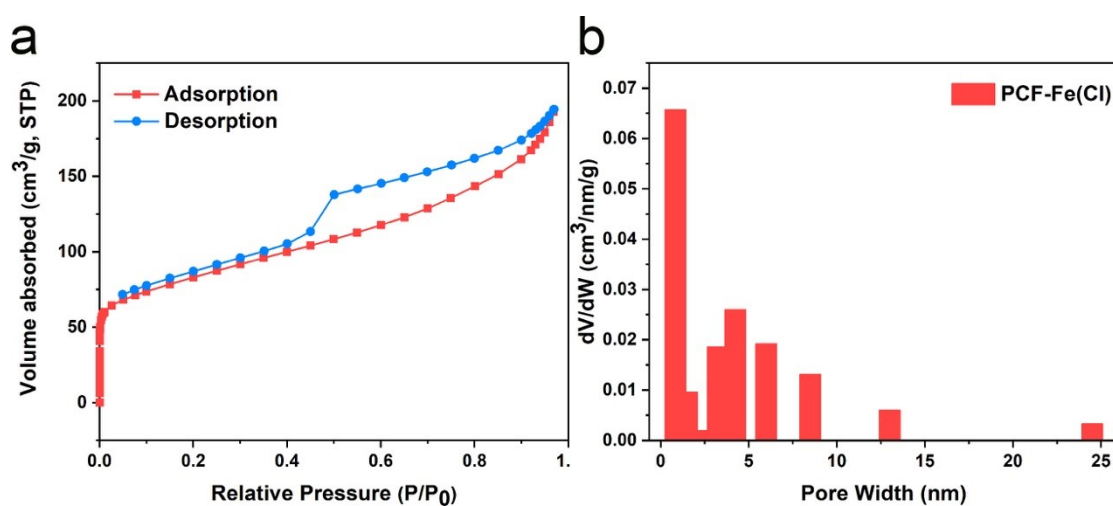

**Figure S4.** (a) N<sub>2</sub> adsorption-desorption isotherms. (b) DFT pore size distributions of PCF-Fe(Cl).

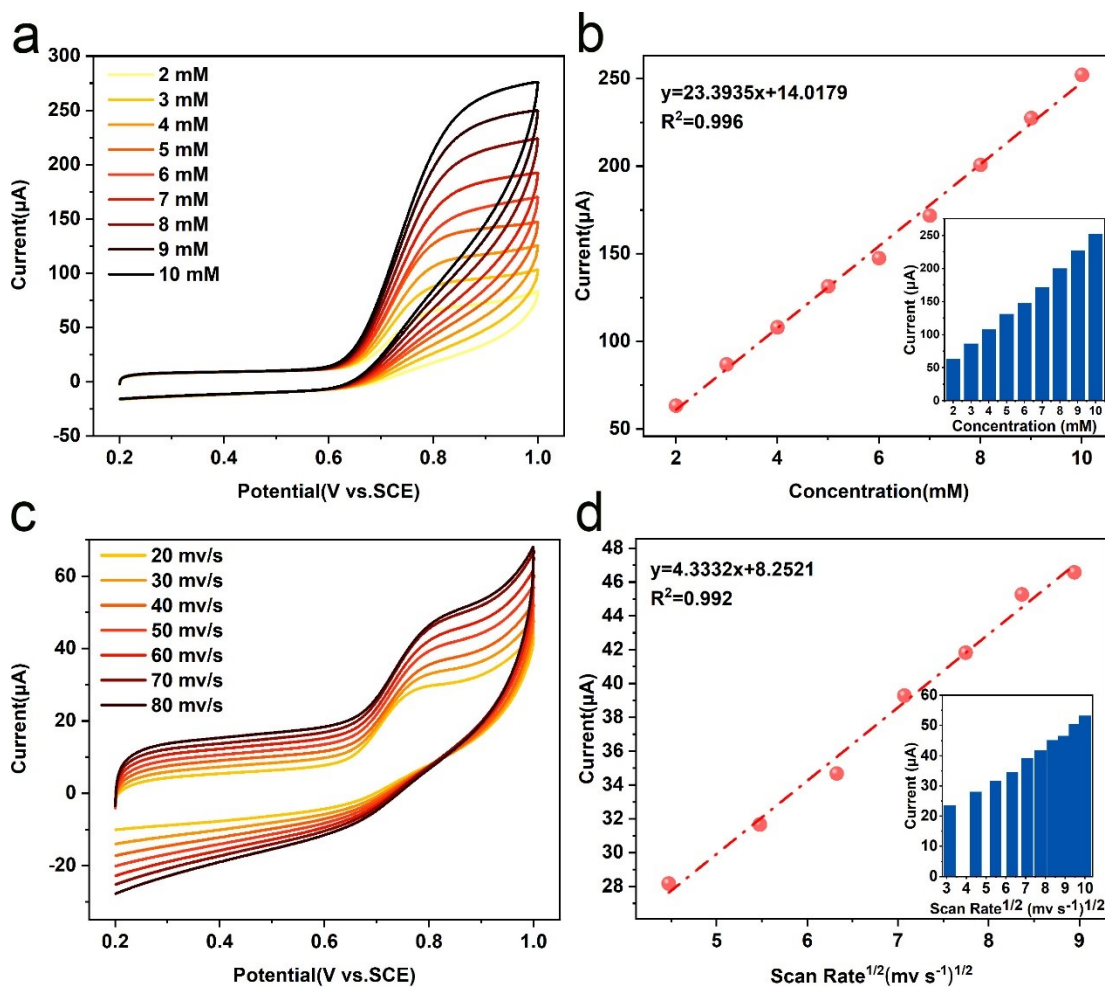

**Figure S5.** (a) CVs of the PCF-Fe(CO) in a series of different nitrite concentration (2–10 mM) (scan rate: 50 mV/s). (b) Linear relationship of the anodic peak current density and nitrite concentration. (c) CVs of the PCF-Fe(CO) in 0.10 M PBS (pH = 7) containing 2 mM nitrite (scan rate: 20–80 mV/s). (d) The linear relationship of the anodic peak currents and the square root of the scan rates.

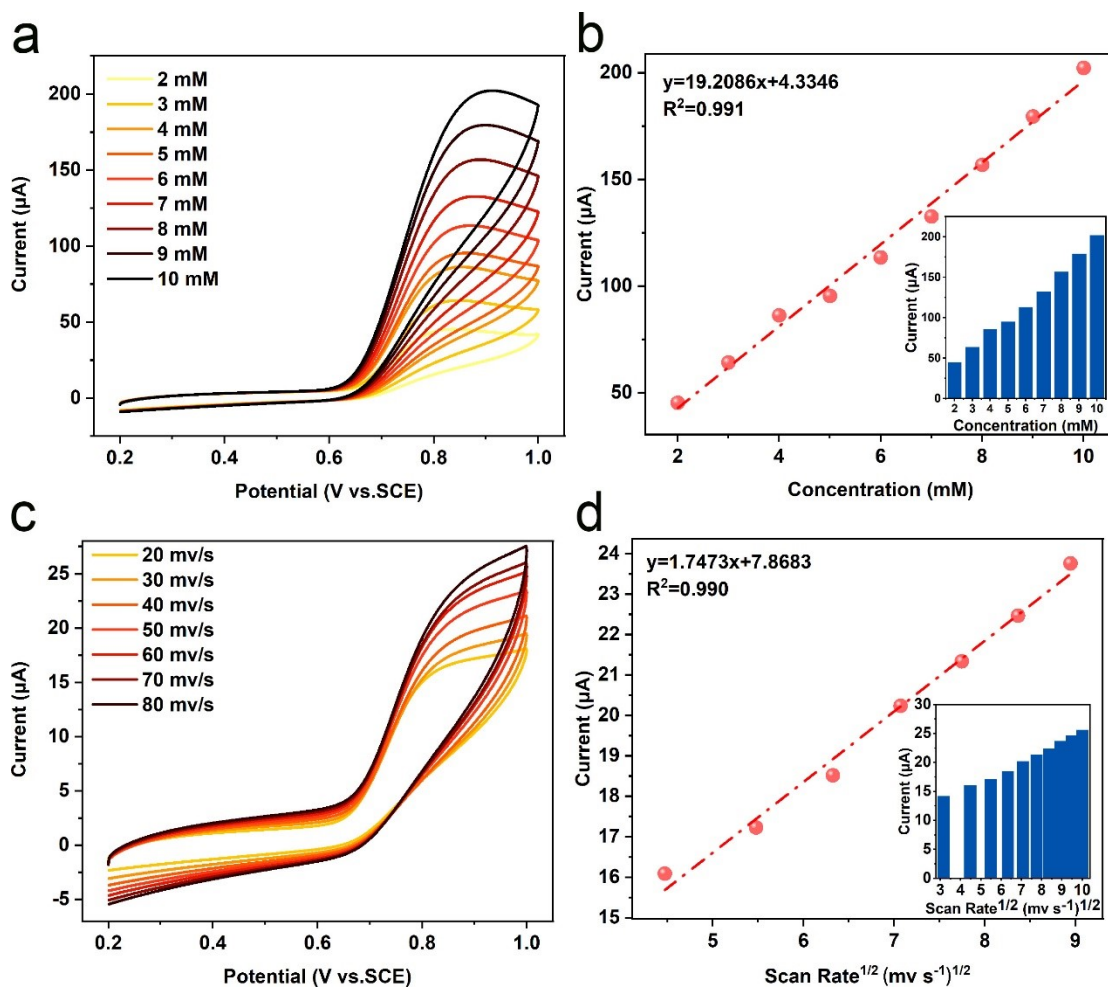

**Figure S6.** (a) CVs of the PCF in a series of different nitrite concentration (2–10 mM) (scan rate: 50 mV/s). (b) Linear relationship of the anodic peak current density and nitrite concentration. (c) CVs of the PCF in 0.10 M PBS (pH = 7) containing 2 mM nitrite (scan rate: 20-80 mV/s). (d) The linear relationship of the anodic peak currents and the square root of the scan rates.



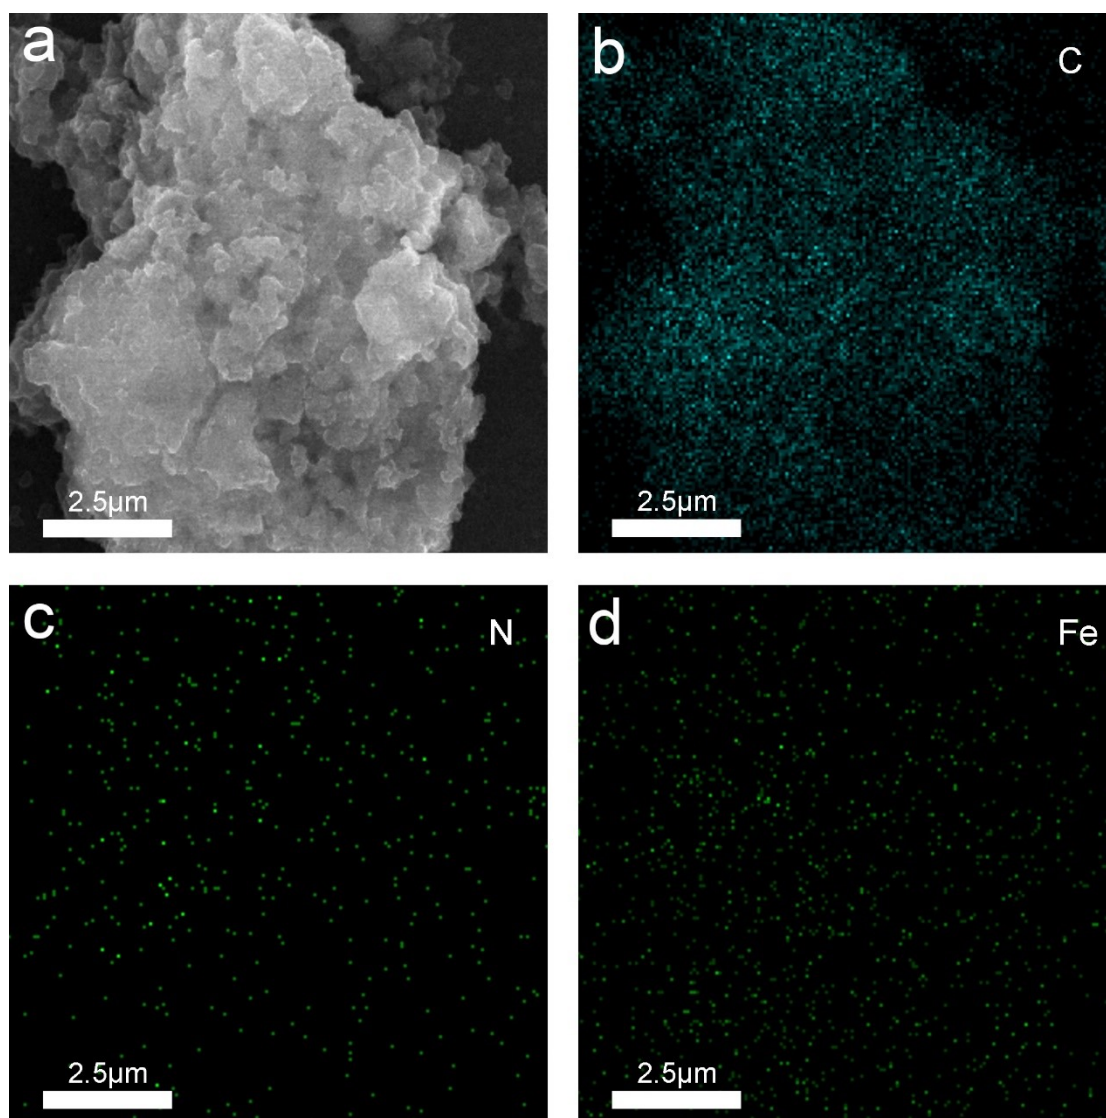

**Figure S7.** (a-d) SEM images and element mapping of PCF-Fe(Cl)

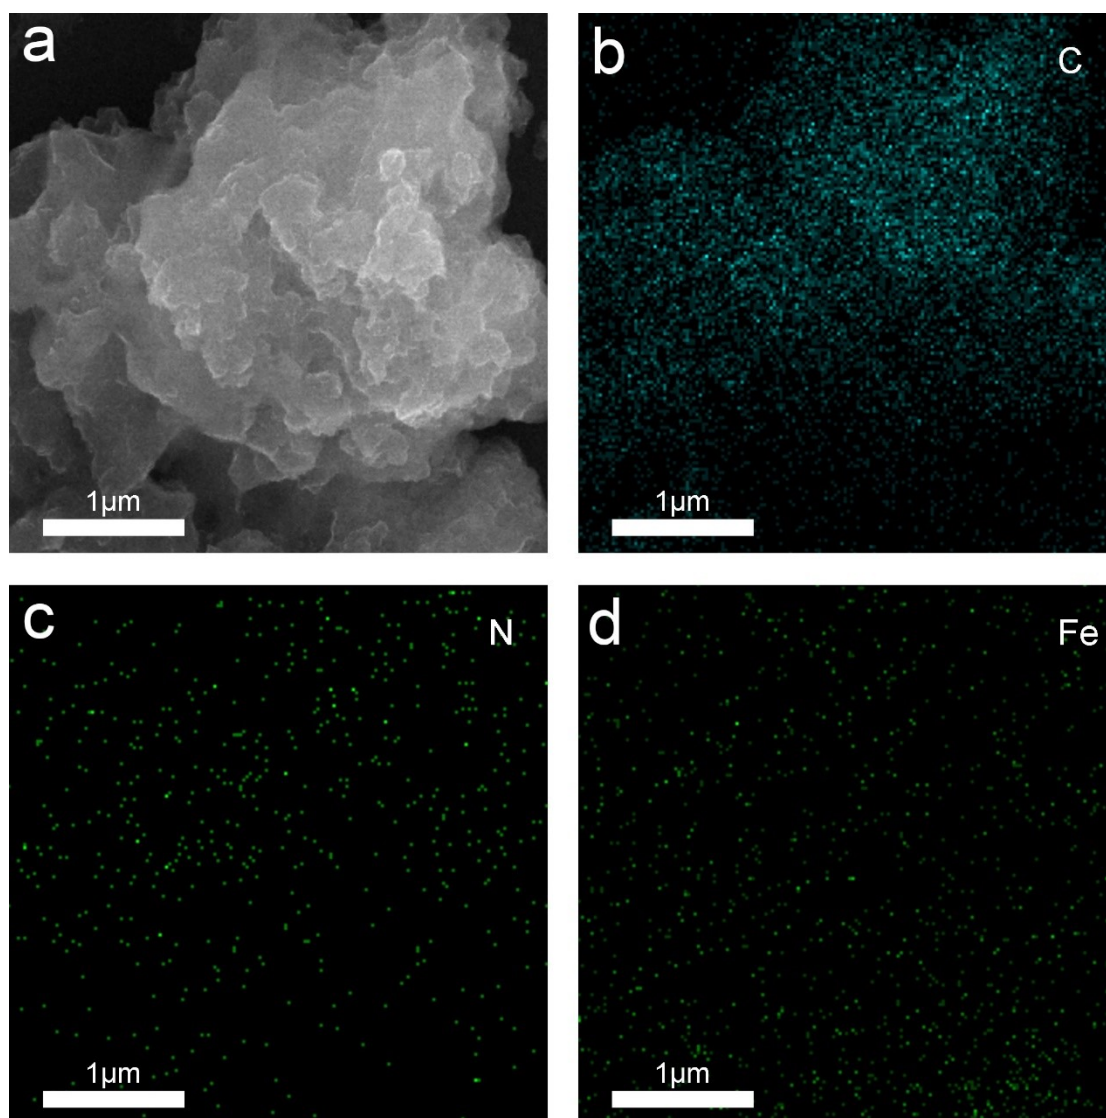

**Figure S8.** (a-d) SEM images and element mapping of PCF-Fe(Cl) (After Reaction)

**Table S1.** Comparison of Fe loading (wt%) (ICP)

| Sample     | Fe loading(wt%) |
|------------|-----------------|
| PCF-Fe(Cl) | 4.25%           |
| PCF-Fe(CO) | 3.92%           |

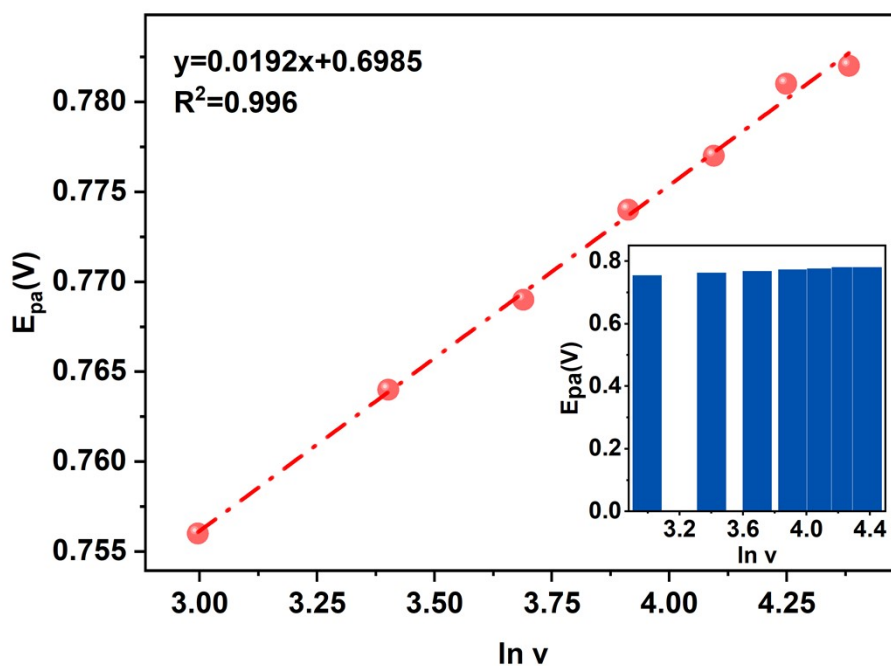

**Figure S9.** The linear relationship between the anodic peak potential ( $E_{pa}$ ) and napierian logarithm of the scan rate ( $\ln v$ ).
